# Supplementary material
Source: MDPI journal article supplement (https://www.mdpi.com/2073-4344/14/2/151)
Supplement: s1 [file s1 › catalysts-2828280-supplementary.pdf]

## Supporting Information

# Influence of Particle Size of CeO<sub>2</sub> Nanospheres Encapsulated in SBA-15 Mesopores on SO<sub>2</sub> Tolerance during NH<sub>3</sub>-SCR Reaction

Xinyu Han <sup>1,2,3</sup>, Mengyao Bian <sup>1,2,3</sup>, Kaijie Liu <sup>1,2,3,\*</sup>, Xin Yang <sup>1,2,3</sup>, Daying Zheng <sup>1,2,3</sup>,  
Xiangguang Yang <sup>1,2,3,4</sup>  
and Yibo Zhang <sup>1,2,3,4,\*</sup>

- <sup>1</sup> Ganjiang Innovation Academy, Chinese Academy of Sciences, No.1, Science Academy Road, Ganzhou 341000, China; xinyuhan@mail.ustc.edu.cn (X.H.); mybian20@gia.cas.cn (M.B.); yxupupup@mail.ustc.edu.cn (X.Y.); dayingz@mail.ustc.edu.cn (D.Z.); xgyang@gia.cas.cn (X.Y.)
- <sup>2</sup> School of Rare Earths, University of Science and Technology of China, Hefei 230041, China
- <sup>3</sup> Key Laboratory of Rare Earths, Chinese Academy of Sciences, Ganzhou 341000, China
- <sup>4</sup> Changchun Institute of Applied Chemistry, Chinese Academy of Sciences, Changchun 130022, China
- \* Correspondence: liukaijie@gia.cas.cn (K.L.); yibo Zhang@gia.cas.cn (Y.Z.); Tel.: +86-0797-2130675 (Y.Z.)

## Content

|                                                                                                                                                 |                                     |
|-------------------------------------------------------------------------------------------------------------------------------------------------|-------------------------------------|
| 1 Pore Structure of SBA-15 .....                                                                                                                | 1                                   |
| 2 Particle size measured by laser particle size analyzer .....                                                                                  | 2                                   |
| 3 NH <sub>3</sub> -SCR performance of different loading percentage of CeO <sub>2</sub> nanospheres on SBA-15 .....                              | 3                                   |
| 4 EDS mapping of Ce/SBA-S series catalyst .....                                                                                                 | 4                                   |
| 5 NH <sub>3</sub> and H <sub>2</sub> consumption of catalysts.....                                                                              | 5                                   |
| 6 N <sub>2</sub> isotherm adsorption and desorption curves .....                                                                                | 6                                   |
| 7 Data of reaction order test.....                                                                                                              | 8                                   |
| 8 In-situ DRIFT spectra of the adsorption of NH <sub>3</sub> at different temperatures of 9n-Ce/SBA and 9n-Ce/SBA-S.....                        | 9                                   |
| 9 In-situ DRIFT spectra of the adsorption of NO + O <sub>2</sub> at different temperatures of 9n-Ce/SBA and 9n-Ce/SBA-S.....                    | 11                                  |
| 10 In-situ DRIFT spectra of the reaction of NH <sub>3</sub> , NO and O <sub>2</sub> at different temperatures of 9n-Ce/SBA and 9n-Ce/SBA-S..... | 12                                  |
| Reference .....                                                                                                                                 | <b>Error! Bookmark not defined.</b> |

## 1 Pore Structure of SBA-15

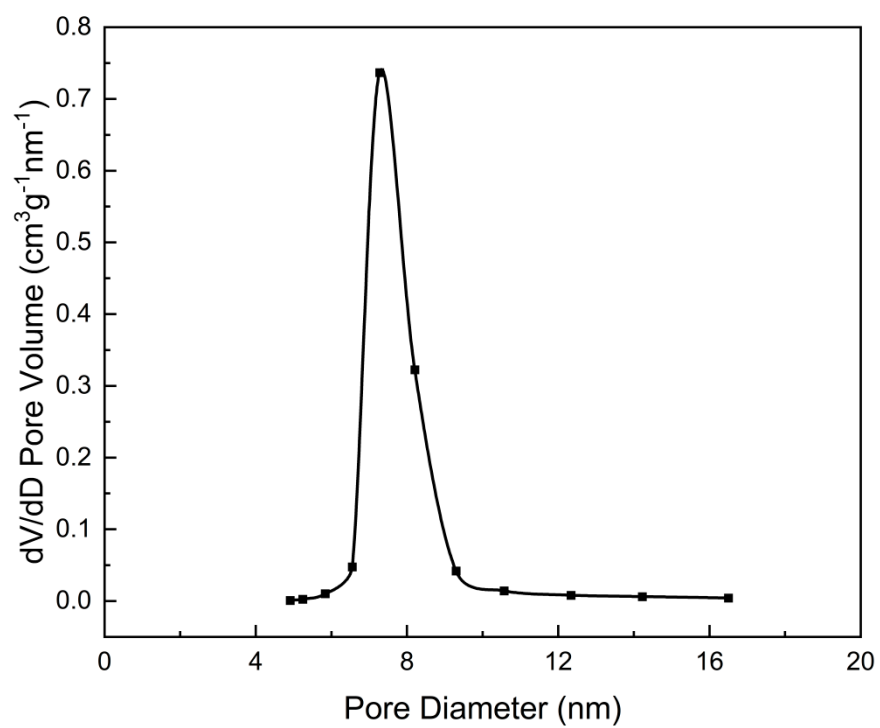

**Fig S1.** BJH pore distribution curves of pure SBA-15.

## 2 Particle size measured by laser particle size analyzer

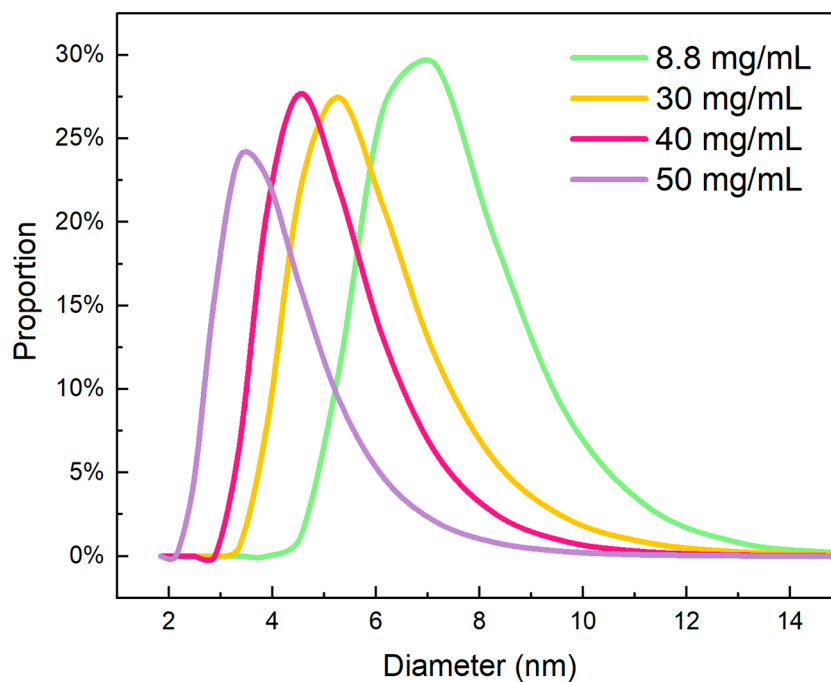

**Fig S2.** Particle size distribution curves of different PVP addition amounts.

**Table S1.** The amount of pvp added and the  $D_{10}$ ,  $D_{50}$  and  $D_{90}$  size data obtained from the laser particle size analyzer.

| PVP amounts in ethanol | $D_{10}$ (nm) | $D_{50}$ (nm) | $D_{90}$ (nm) | Abbreviation |
|------------------------|---------------|---------------|---------------|--------------|
| 8.8 mg/mL              | 5.22          | 6.52          | 8.72          | 9 nm         |
| 30 mg/mL               | 4.06          | 4.96          | 7.02          | 7 nm         |
| 40 mg/mL               | 3.49          | 4.41          | 6.14          | 6 nm         |
| 50 mg/mL               | 2.71          | 3.55          | 5.20          | 5 nm         |

### 3 NH<sub>3</sub>-SCR performance of different loading percentage of CeO<sub>2</sub> nanospheres on SBA-15

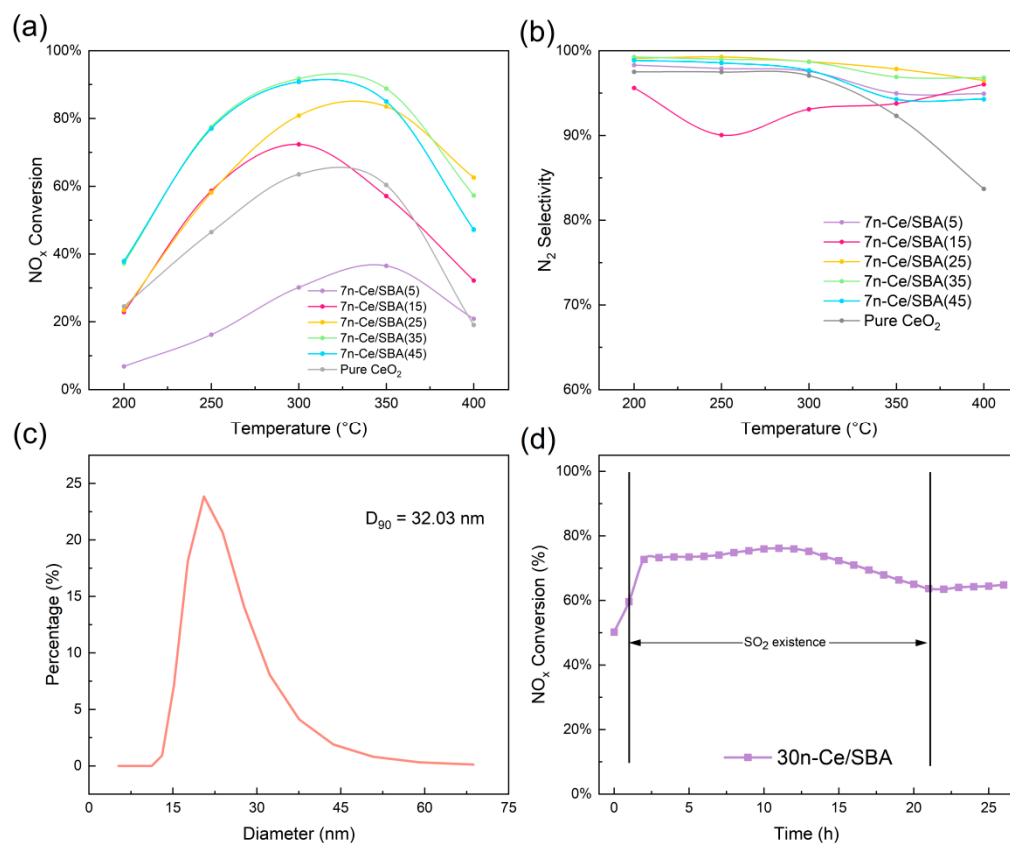

**Fig S3.** NO<sub>x</sub> conversion (a) and N<sub>2</sub> selectivity (b) curves of five different loading percentages of catalysts and pure CeO<sub>2</sub>. (c) particle size distribution curves of PVP addition amounts of 7 mg/mL and (d) NO<sub>x</sub> conversion of 30n-Ce/SBA catalyst in 100 ppm SO<sub>2</sub> existing for 20 h.

#### 4 EDS mapping of Ce/SBA-S series catalyst

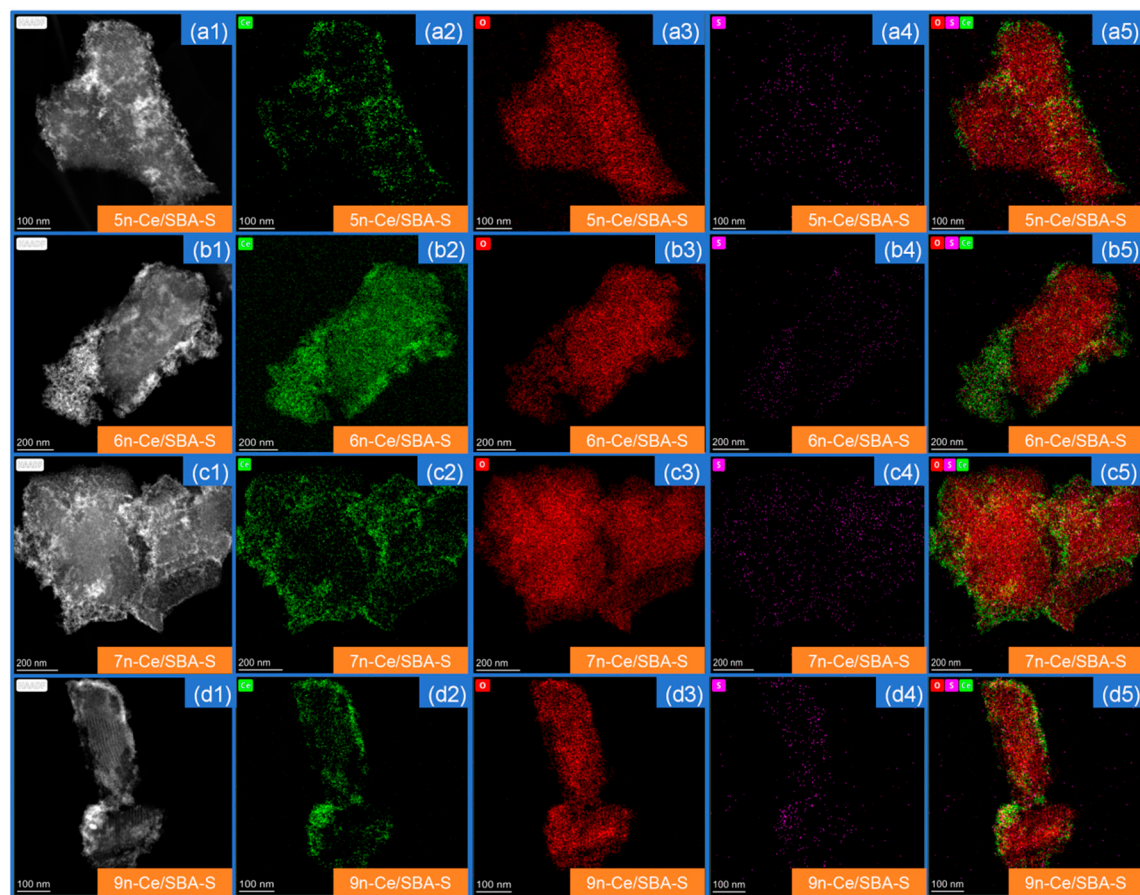

Fig. S4. EDS Mapping of Ce/SBA-S series catalysts.

## 5 NH<sub>3</sub> and H<sub>2</sub> consumption of catalysts

**Table S2.** The fitted NH<sub>3</sub>-TPD data of catalysts.

| Catalysts                                  |                                      | 5n-Ce/SBA | 6n-Ce/SBA | 7n-Ce/SBA | 9n-Ce/SBA | 9nm CeO <sub>2</sub> | SBA-15 |
|--------------------------------------------|--------------------------------------|-----------|-----------|-----------|-----------|----------------------|--------|
| Total NH <sub>3</sub> consumption (mmol/g) |                                      | 0.242     | 0.257     | 0.277     | 0.315     | 0.241                | 0.240  |
| Peak 1                                     | Temperature (°C)                     | 95        | 94        | 94        | 98        | 92                   | 99     |
|                                            | Area (%)                             | 19.01     | 13.61     | 17.46     | 16.43     | 33.38                | 18.05  |
|                                            | NH <sub>3</sub> consumption (mmol/g) | 0.046     | 0.035     | 0.048     | 0.052     | 0.080                | 0.043  |
| Peak 2                                     | Temperature (°C)                     | 164       | 143       | 144       | 164       | 131                  | 154    |
|                                            | Area (%)                             | 48.89     | 25.80     | 34.34     | 43.49     | 22.62                | 13.66  |
|                                            | NH <sub>3</sub> consumption (mmol/g) | 0.118     | 0.066     | 0.095     | 0.137     | 0.055                | 0.033  |
| Peak 3                                     | Temperature (°C)                     | 281       | 254       | 274       | 292       | 206                  | 330    |
|                                            | Area (%)                             | 32.10     | 60.59     | 48.20     | 40.08     | 44.00                | 68.29  |
|                                            | NH <sub>3</sub> consumption (mmol/g) | 0.078     | 0.156     | 0.134     | 0.126     | 0.106                | 0.164  |

**Table S3.** The fitted H<sub>2</sub>-TPR data of catalysts.

| Catalysts                                 |                                     | 5n-Ce/SBA | 6n-Ce/SBA | 7n-Ce/SBA | 9n-Ce/SBA | 9nm CeO <sub>2</sub> |
|-------------------------------------------|-------------------------------------|-----------|-----------|-----------|-----------|----------------------|
| Total H <sub>2</sub> consumption (mmol/g) |                                     | 1.023     | 0.882     | 1.225     | 1.144     | 1.391                |
| Peak 1                                    | Temperature (°C)                    | 433       | 429       | 426       | 450       | 344                  |
|                                           | Area (%)                            | 74.89     | 59.31     | 69.78     | 79.16     | 20.11                |
|                                           | H <sub>2</sub> consumption (mmol/g) | 0.766     | 0.523     | 0.855     | 0.906     | 0.280                |
| Peak 2                                    | Temperature (°C)                    | 623       | 609       | 596       | 605       | 417                  |
|                                           | Area (%)                            | 23.37     | 40.20     | 23.49     | 10.93     | 37.25                |
|                                           | H <sub>2</sub> consumption (mmol/g) | 0.239     | 0.355     | 0.288     | 0.125     | 0.518                |
| Peak 3                                    | Temperature (°C)                    | 741       | 778       | 674       | 673       | 671                  |
|                                           | Area (%)                            | 1.74      | 0.49      | 6.73      | 9.91      | 42.64                |
|                                           | H <sub>2</sub> consumption (mmol/g) | 0.018     | 0.004     | 0.082     | 0.113     | 0.593                |

## 6 XPS data of 30n-Ce/SBA-S

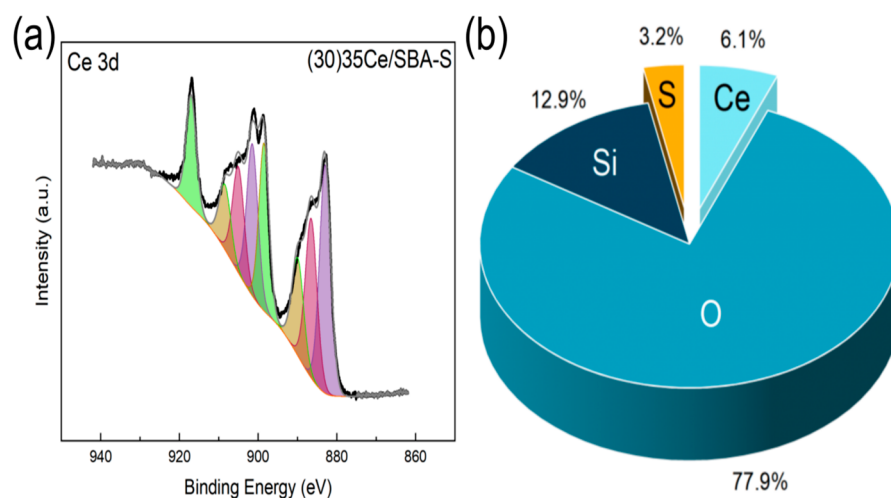

**Fig. S5.** (a) XPS spectrum of Ce 3d orbital of 30n-Ce/SBA-S and (b) content of elements on the surface of 30n-Ce/SBA-S from XPS results.

**Table S4.** The binding energy of the peak U of Ce 3d orbital of catalysts after SO<sub>2</sub> poisoning.

| Catalyst            | 5n-Ce/SBA | 6n-Ce/SBA | 7n-Ce/SBA | 9n-Ce/SBA     | 30n-Ce/SBA |
|---------------------|-----------|-----------|-----------|---------------|------------|
| Binding Energy (eV) | 883.19    | 883.30    | 883.43    | <b>883.50</b> | 882.99     |

## 7 N<sub>2</sub> isotherm adsorption and desorption curves

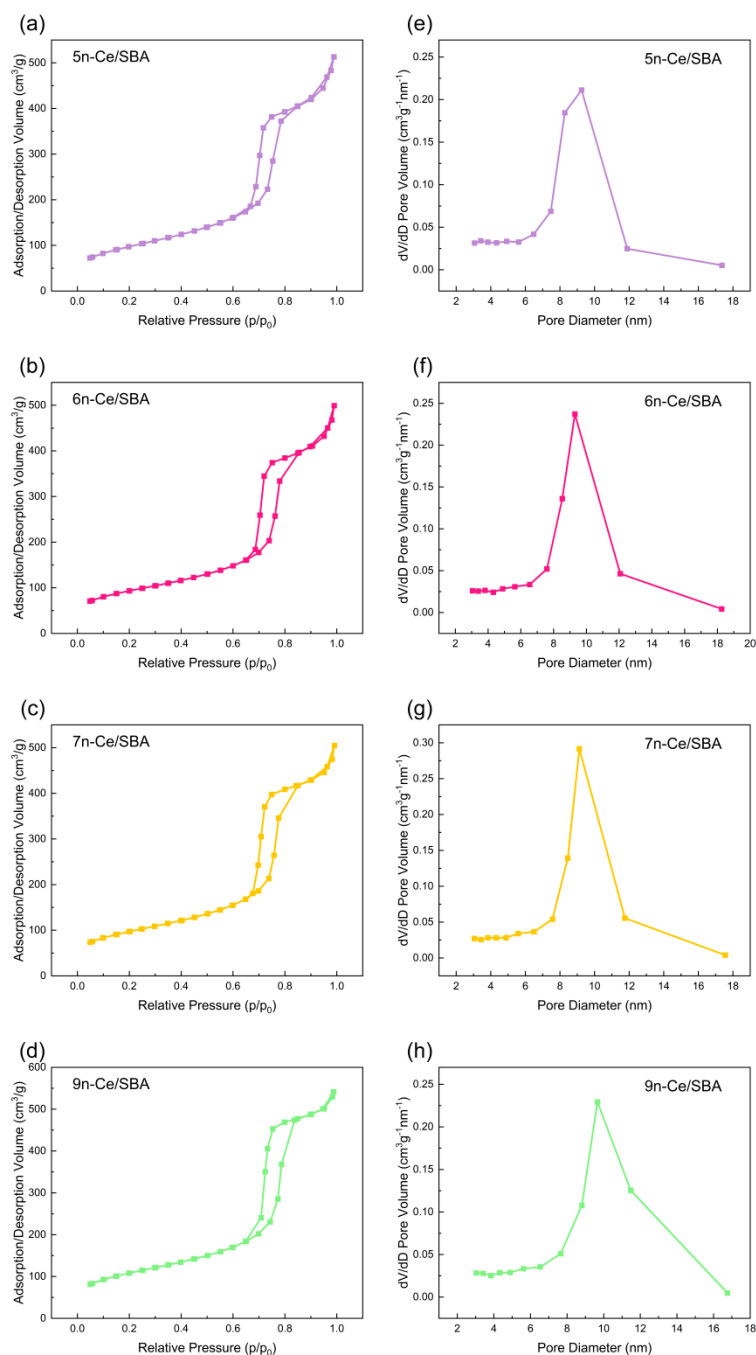

**Fig. S6.** N<sub>2</sub> adsorption-desorption curve and pore distribution curve of some catalysts.

**Table S5.** Specific surface area, average pore volume and pore size of catalysts.

| Catalyst  | BET specific surface area (m <sup>2</sup> /g) | Average pore volume (cm <sup>3</sup> /g) | Average pore size (nm) | BJH most probable pore size (nm) |
|-----------|-----------------------------------------------|------------------------------------------|------------------------|----------------------------------|
| 5n-Ce/SBA | 345                                           | 0.812                                    | 4.48                   | 9.25                             |
| 6n-Ce/SBA | 324                                           | 0.782                                    | 4.76                   | 9.30                             |
| 7n-Ce/SBA | 339                                           | 0.794                                    | 4.59                   | 9.12                             |
| 9n-Ce/SBA | 378                                           | 0.845                                    | 4.58                   | 9.66                             |

## 8 Data of reaction order test

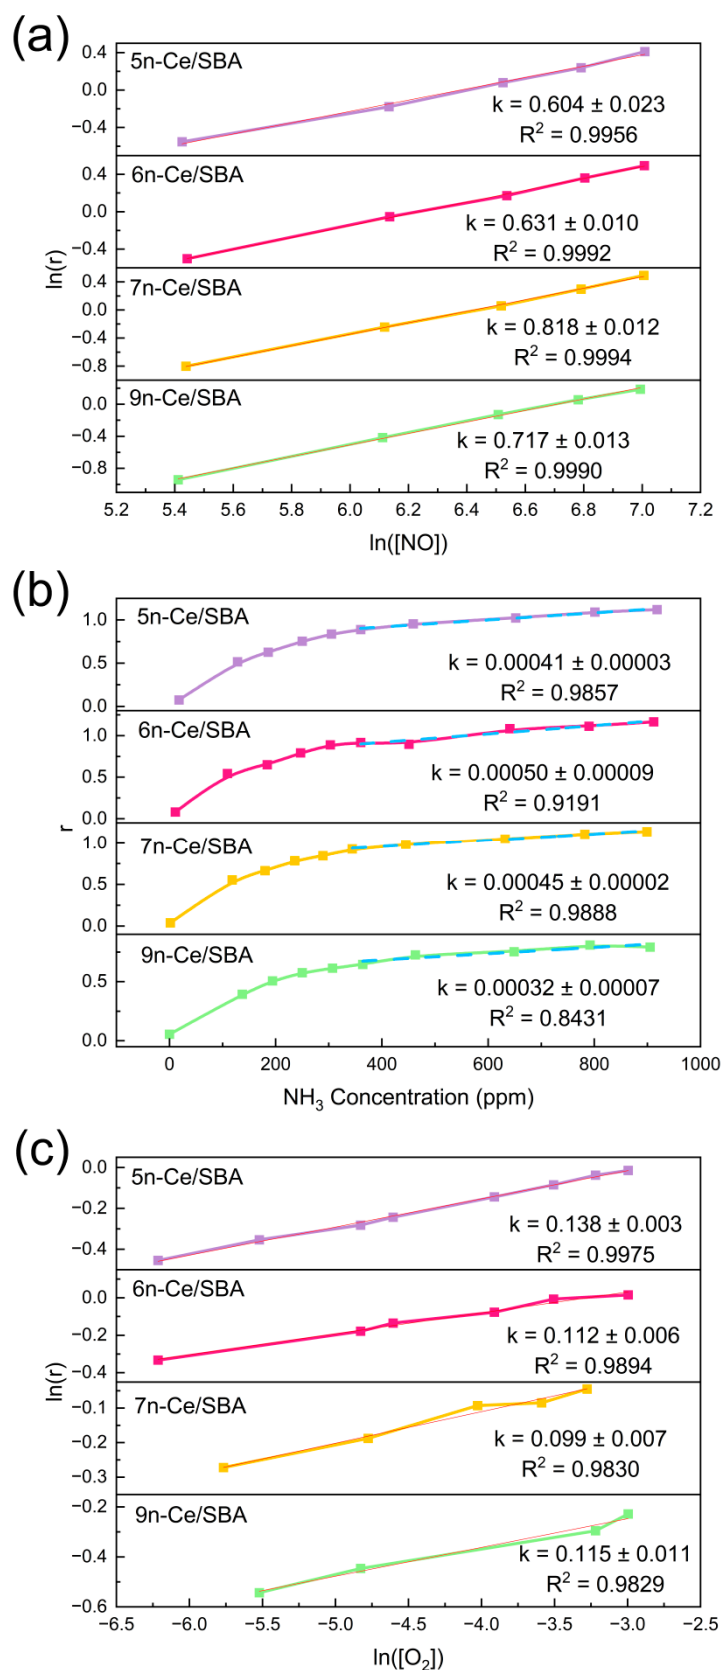

**Fig. S7.** Dependence of NO conversion rate upon (a) NO, (b) NH<sub>3</sub> and (c) O<sub>2</sub> concentration.

**Derivation: How the reaction mechanism is inferred from the rate equation**

(1) The Mathematical expression of chemical reaction based on L-H mechanism:

$$r = k\theta_A\theta_B = k\frac{a_Aa_BP_AP_B}{1+a_AP_A+a_BP_B} \quad (S1)$$

(2) When the adsorption of component A is stronger than that of component B, it could be inferred  $a_AP_A \gg 1+a_BP_B$ , so:

$$r = k\theta_A\theta_B \approx k_1\frac{a_BP_B}{a_AP_A} = k_2\frac{P_B}{P_A} \quad (S2)$$

At this point, the reaction order of A is -1, and the reaction order of B is 1.

(3) When both reactants A and B are weakly adsorbed, it could be inferred

$a_AP_A+a_BP_B \ll 1$ , so

$$r = k\theta_A\theta_B \approx k_3a_AP_Aa_BP_B = k_4P_AP_B \quad (S3)$$

At this point, the reaction order of A and B are both 1.

(1) The Mathematical expression of chemical reaction based on E-R mechanism:

$$r = k\theta_AP_B = k\frac{a_AP_AP_B}{1+a_AP_A+a_BP_B} \quad (S4)$$

(2) When the adsorption of component A is stronger than that of component B, it could be inferred  $a_AP_A \gg 1+a_BP_B$ , so:

$$r = k\theta_AP_B \approx k_5P_Ba_B = k_6P_B \quad (S5)$$

At this point, the reaction order of A is 0, and the reaction order of B is 1.

(4) When both reactants A and B are weakly adsorbed, it could be inferred

$a_AP_A+a_BP_B \ll 1$ , so

$$r = k\theta_AP_B \approx k_6P_Aa_BP_B = k_7P_AP_B \quad (S6)$$

At this point, the reaction order of A and B are both 1.

For the Ce/SBA catalysts in this work, part of NO participates in the reaction by L-H mechanism, so its reaction order is less than 0, while the rest of NO participates in the reaction by E-R mechanism, so its reaction order is 1. After weighted average, the resulting apparent reaction order of NO is between 0 and 1.

## 9 In-situ DRIFT spectra of the adsorption of NH<sub>3</sub> at different temperatures of 9n-Ce/SBA and 9n-Ce/SBA-S

**Table S6.** Materials corresponding to different wavenumbers and references.

| Wavenumber (cm <sup>-1</sup> ) | Species                                                                                                         | Ref.   |
|--------------------------------|-----------------------------------------------------------------------------------------------------------------|--------|
| 3300 peak groups               | N-H bonds of Lewis Acid-NH <sub>3</sub> species                                                                 | [1, 2] |
| 1419, 1439, 1435               | Bronsted Acid-NH <sup>4+</sup> species                                                                          |        |
| 1574                           | Symmetric and asymmetric bending vibrations of N-H bonds in the NH <sub>3</sub> coordinated to Lewis acid sites | [3]    |
| 1338, 1327                     | Oxidized species of NH <sub>3</sub>                                                                             | [4]    |
| 1284, 1277                     | Symmetric deformation of coordinated NH <sub>3</sub>                                                            |        |
| 1103                           | NH <sub>3</sub> on Lewis acid sites over pure CeO <sub>2</sub>                                                  | [5]    |
| 1535, 1539                     | Monodentate nitrate species                                                                                     | [6]    |
| 1578                           | Stretching vibration ( $\nu_3$ ) of bidentate nitrate Species                                                   |        |
| 1273, 1277                     | Asymmetric vibration of NO <sub>2</sub> <sup>-</sup> species                                                    |        |
| 1817                           | Stretching vibration ( $\nu_3$ ) of N-O bonds                                                                   |        |
| 1381, 1385                     | $\nu_3$ vibration of free NO <sub>3</sub> <sup>-</sup> ion                                                      |        |
| 1315, 1304                     | Stretching vibration of M-NO <sub>2</sub> (nitro compound)                                                      |        |
| 1107, 1103                     | Cis-N <sub>2</sub> O <sub>2</sub> <sup>2-</sup> species on lanthanide oxide                                     |        |

The catalyst was pretreated at 400 °C in 40 mL/min of Argon atmosphere for 30 min. Then 500 ppm NH<sub>3</sub>-Ar was passed into the sample cell at 200 °C and the changes of IR spectrum were recorded for 15 min. Then sample cell was heated to 250 °C, 300 °C, 350 °C and 400 °C, during which time the changes in the IR spectra were continuously recorded. The IR spectra of the catalysts are plotted as **Fig. S8**.

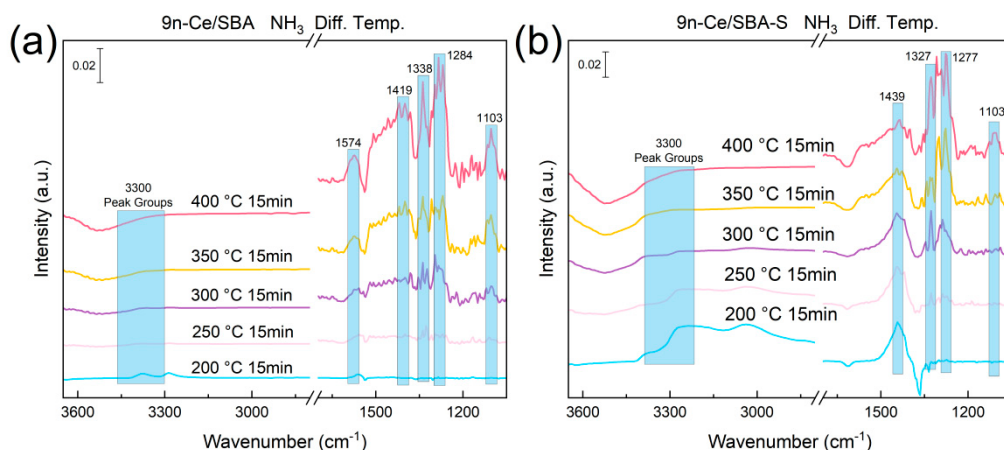

**Fig. S8.** In-situ DRIFT spectra of the adsorption of NH<sub>3</sub> at different temperatures of (a) 9n-Ce/SBA and (b) 9n-Ce/SBA-S.

## 10 In-situ DRIFT spectra of the adsorption of NO + O<sub>2</sub> at different temperatures of 9n-Ce/SBA and 9n-Ce/SBA-S

The catalyst was pretreated at 400 °C in 40 mL/min of Argon atmosphere for 30 min. Then 500 ppm NO-Ar and 5% O<sub>2</sub> were passed into the sample cell at 200 °C and the changes of IR spectrum were recorded for 15 min. Then sample cell was heated to 250 °C, 300 °C, 350 °C and 400 °C, during which time the changes in the IR spectra were continuously recorded. The IR spectra of the catalysts are plotted as **Fig. S9**.

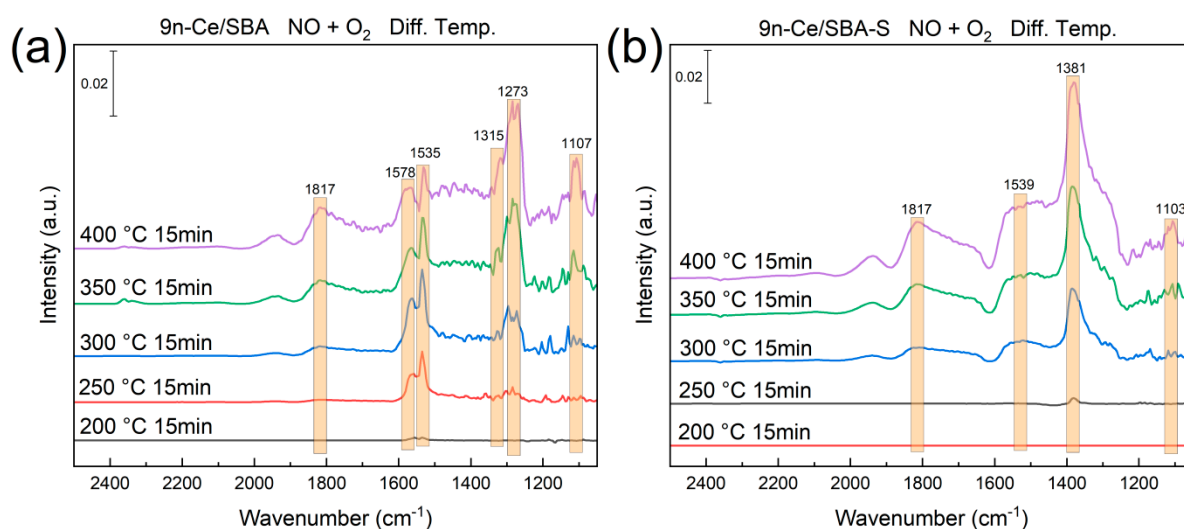

**Fig. S9.** In-situ DRIFT spectra of the adsorption of NO + O<sub>2</sub> at different temperatures of (a) 9n-Ce/SBA and (b) 9n-Ce/SBA-S.

## 11 In-situ DRIFT spectra of the reaction of $\text{NH}_3$ , $\text{NO}$ and $\text{O}_2$ at different temperatures of 9n-Ce/SBA and 9n-Ce/SBA-S

The catalyst was pretreated at 400 °C in 40 mL/min of Argon atmosphere for 30 min. Then 500 ppm NO-Ar, 500 ppm  $\text{NH}_3$ -Ar and 5%  $\text{O}_2$  were then passed into the sample cell at 200 °C and the changes of IR spectrum were recorded for 15 min. Then sample cell was heated to 250 °C, 300 °C, 350 °C and 400 °C, during which time the changes in the IR spectra were continuously recorded. The IR spectra of the catalysts are plotted as **Fig. S10**.

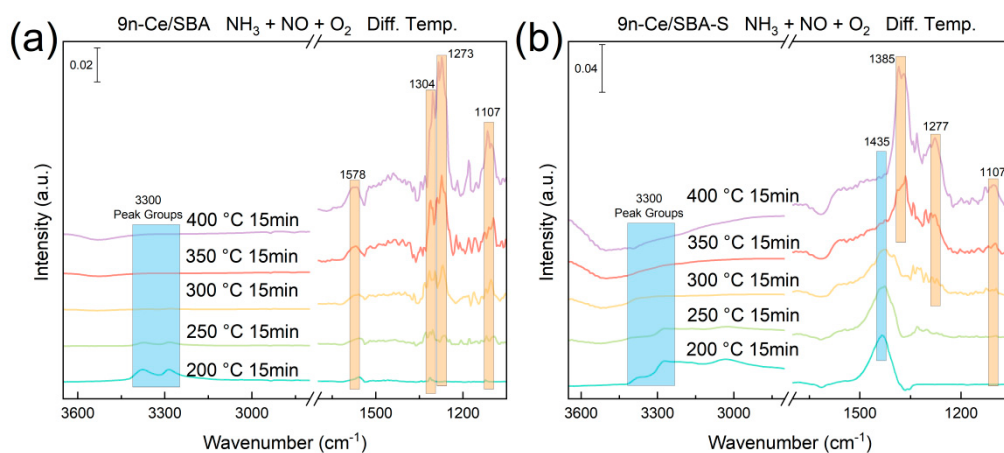

**Fig. S10.** In-situ DRIFT spectra of the reaction of  $\text{NO}$ ,  $\text{NH}_3$  and  $\text{O}_2$  at different temperatures of (a) 9n-Ce/SBA and (b) 9n-Ce/SBA-S.
